# Supplementary material
Source: PubMed Central journal article supplement (PMC3427075)
Supplement: 1204257109_pnas.201204257SI.pdf [file 1204257109_pnas.201204257SI.pdf]

# Supporting Information

Norgett et al. 10.1073/pnas.1204257109

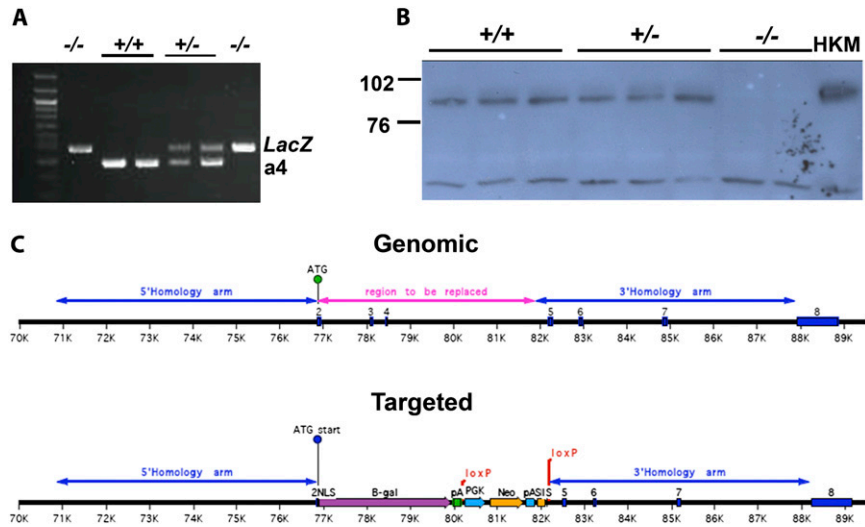

**Fig. S1.** Generation of the *Atp6v0a4*-null line. (A) Genotyping PCR showing homozygous WT *a4* allele in +/+ animals, homozygous targeted *LacZ* allele in -/- animals, and both alleles in +/- animals. (B) Western blot of total kidney lysates showing *a4* protein between the 76- and 102-kDa markers in +/+ and +/- but not -/- animals. HKM, human kidney membrane control. An internal loading control is provided by the previously described nonspecific band at around 50 kDa (1), present in all lanes. (C) Schematic of the *Atp6v0a4* locus and targeting construct.

1. Smith AN, et al. (2000) Mutations in *ATP6N1B*, encoding a new kidney vacuolar proton pump 116-kD subunit, cause recessive distal renal tubular acidosis with preserved hearing. *Nat Genet* 26:71-75.



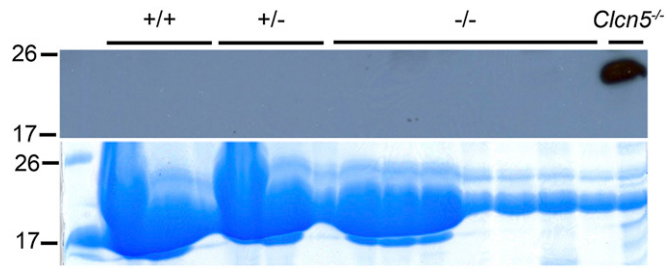

**Fig. S4.** Western blot analysis of RBP in 3-mo animals showed the typical band of 21 kDa in urine from *Clcn5*<sup>-/-</sup> mice (which have proximal tubulopathy) and no bands present in a 10-fold load of urine in any *Atp6v0a4* samples, regardless of genotype.

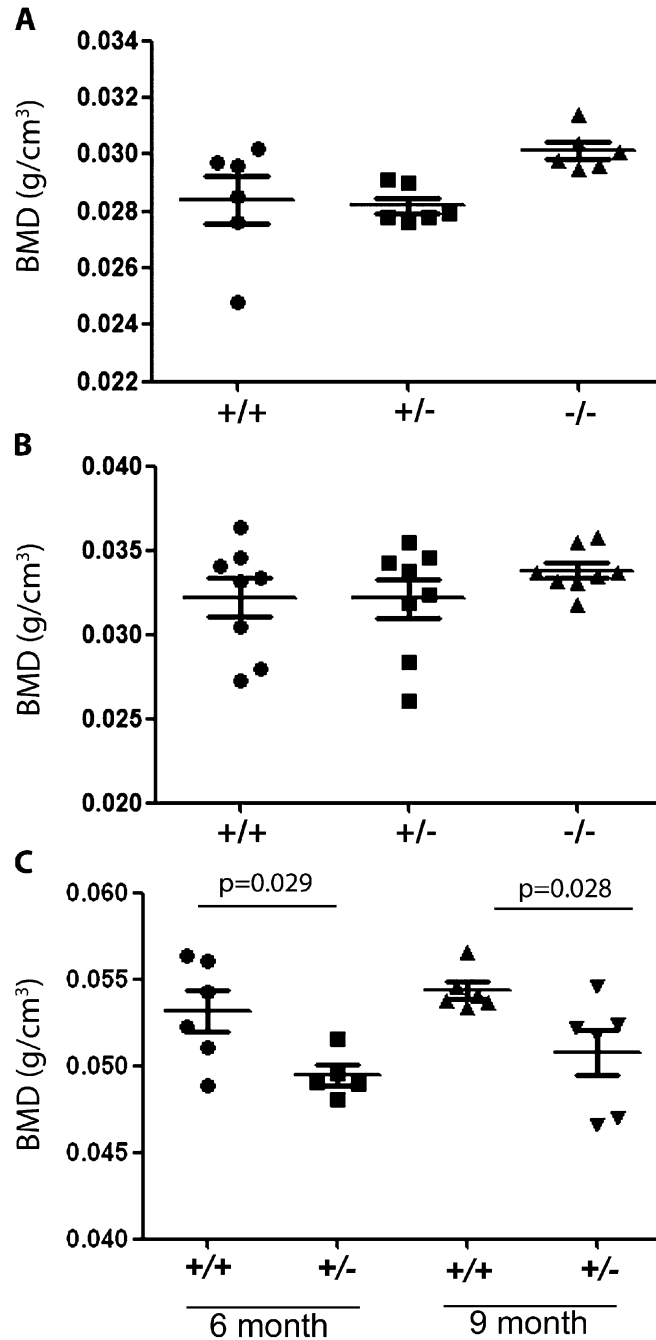

**Fig. S5.** BMD was the same in +/+, +/-, and -/- animals at 14 d (A) and 21 d (B). At 6 and 9 mo, BMD was reduced in chronically acidified +/- animals compared with +/+ (C).

**Table S1. Urine biochemistry of 3-mo-old animals following chronic alkalization**

|           | Untreated*          |                      |                     | <i>P</i> | Chronically alkalized <sup>†</sup> |                     |                     | <i>P</i> |
|-----------|---------------------|----------------------|---------------------|----------|------------------------------------|---------------------|---------------------|----------|
|           | +/+ ( <i>n</i> = 9) | +/- ( <i>n</i> = 10) | -/- ( <i>n</i> = 8) |          | +/+ ( <i>n</i> = 6)                | +/- ( <i>n</i> = 5) | -/- ( <i>n</i> = 7) |          |
| Sodium    | 0.4 ± 0.05          | 0.4 ± 0.04           | 0.5 ± 0.07          | NS       | 1.4 ± 0.19                         | 1.1 ± 0.08          | 1.7 ± 0.27          | NS       |
| Potassium | 0.7 ± 0.08          | 0.9 ± 0.07           | 0.7 ± 0.09          | NS       | 0.8 ± 0.05                         | 0.7 ± 0.09          | 0.8 ± 0.13          | NS       |
| Chloride  | 0.7 ± 0.10          | 0.9 ± 0.05           | 0.8 ± 0.12          | NS       | 1.0 ± 0.13                         | 0.8 ± 0.14          | 1.1 ± 0.15          | NS       |

Urine was collected from pairs of animals; the number of pairs (*n*) is indicated in parentheses. All values are means ± SEM. Units are mmol/24 h.

\*-/- animals withdrawn from alkali treatment 7 d before acute treatment.

<sup>†</sup>-/- animals had received lifelong alkali treatment.

**Table S2. Whole-blood biochemistry of 3-mo animals following acute alkalization or acidification**

|                  | Acute-alkalinized         |                     |                      |          | Acute-acidified          |                     |                      |          |
|------------------|---------------------------|---------------------|----------------------|----------|--------------------------|---------------------|----------------------|----------|
|                  | +/+ ( <i>n</i> = 9)       | +/- ( <i>n</i> = 8) | -/- ( <i>n</i> = 8)* | <i>P</i> | +/+ ( <i>n</i> = 8)      | +/- ( <i>n</i> = 8) | -/- ( <i>n</i> = 8)* | <i>P</i> |
| Sodium           | 145.1 ± 0.48              | 144.0 ± 0.46        | 145.9 ± 0.67         | NS       | 144.5 ± 1.15             | 143.3 ± 0.37        | 147.5 ± 0.57         | 0.0346   |
| Potassium        | 4.2 ± 0.19                | 4.1 ± 0.20          | 3.6 ± 0.09           | 0.0096   | 5.3 ± 0.17 <sup>‡</sup>  | 4.9 ± 0.13          | 4.2 ± 0.16           | 0.0004   |
| Chloride         | 109.4 ± 1.00 <sup>†</sup> | 108.8 ± 0.59        | 110.0 ± 0.65         | NS       | 127.1 ± 1.38             | 125.4 ± 1.12        | 130.3 ± 0.84         | NS       |
| Urea             | 4.6 ± 0.24 <sup>†</sup>   | 6.1 ± 0.41          | 7.7 ± 1.18           | 0.0229   | 10.3 ± 1.85              | 8.9 ± 0.72          | 12.2 ± 0.67          | NS       |
| Creatinine       | 28.9 ± 2.74               | 33.3 ± 2.25         | 35.1 ± 1.48          | NS       | 24.1 ± 1.53 <sup>‡</sup> | 22.0 ± 0.71         | 27.3 ± 1.07          | NS       |
| pH               | 7.44 ± 0.02               | 7.43 ± 0.04         | 7.38 ± 0.02          | NS       | 7.05 ± 0.04              | 7.07 ± 0.02         | 7.03 ± 0.04          | NS       |
| pCO <sub>2</sub> | 5.3 ± 0.39                | 5.6 ± 0.55          | 6.9 ± 0.22           | 0.0026   | 4.8 ± 0.47               | 5.2 ± 0.33          | 4.8 ± 0.40           | NS       |
| Bicarbonate      | 26.2 ± 1.20               | 27.3 ± 0.83         | 30.5 ± 0.74          | 0.0096   | 9.9 ± 1.08               | 11.4 ± 0.75         | 9.6 ± 0.71           | NS       |
| Osmolality       | 296.9 ± 0.90 <sup>†</sup> | 299.5 ± 0.93        | 301.9 ± 2.10         | 0.0459   | 303.8 ± 1.42             | 299.1 ± 0.97        | 311.3 ± 0.84         | 0.0005   |
| BE               | 2.0 ± 1.20                | 3.1 ± 1.03          | 5.5 ± 1.02           | 0.0446   | -20.9 ± 1.52             | -18.8 ± 0.98        | -21.1 ± 1.14         | NS       |

All values are means ± SEM. *P* values relate to the difference between +/+ groups and -/-. All units are mM, except creatinine (μM); pCO<sub>2</sub> (kPa); pH; and BE.

\*-/- animals withdrawn from alkali treatment 7 d before acute treatment.

<sup>†</sup>*n* = 8.

<sup>‡</sup>*n* = 7.

**Table S3. Urine biochemistry of 3-mo-old animals following chronic acidification**

|           | +/+        | +/-        | <i>P</i> |
|-----------|------------|------------|----------|
| Sodium    | 0.3 ± 0.05 | 0.4 ± 0.03 | NS       |
| Potassium | 0.6 ± 0.07 | 0.8 ± 0.06 | NS       |
| Chloride  | 1.4 ± 0.22 | 1.7 ± 0.11 | NS       |

Urine was collected from nine pairs of animals of each genotype. All values are means ± SEM. Units are mmol/24 h.

**Table S4. Urine calcium:creatinine ratio before and after in vitro sample acidification**

|                      | Unacidified | Acidified  |
|----------------------|-------------|------------|
| +/+ ( <i>n</i> = 10) | 0.7 ± 0.03  | 0.9 ± 0.05 |
| +/- ( <i>n</i> = 12) | 0.8 ± 0.16  | 0.9 ± 0.17 |
| -/- ( <i>n</i> = 12) | 0.3 ± 0.03  | 0.7 ± 0.08 |

All values are means ± SEM. Urine was collected from pairs of animals.
